# Supplementary material for: Chromium Flavonoid Complexation in an Antioxidant Capacity Role
Source: MDPI journal article supplement (doi:10.3390/ijms23137171), 2022-06-28
Supplement: s1 [file s1]

## **Chromium flavonoid complexation in an antioxidant capacity role**

S. Matsia,<sup>a</sup> O. Tsave,<sup>a</sup> A. Hatzidimitriou,<sup>b</sup> A. Salifoglou<sup>a\*</sup>

\* Author to whom correspondence should be addressed.

Tel: +30-2310-996-179, E-mail: [salif@auth.gr](mailto:salif@auth.gr)

<sup>a</sup> Laboratory of Inorganic Chemistry and Advanced Materials, School of Chemical Engineering, Aristotle University of Thessaloniki, Thessaloniki 54124, Greece

<sup>b</sup> Laboratory of Inorganic Chemistry, School of Chemistry, Aristotle University of Thessaloniki, Thessaloniki 54124, Greece

## Tables

**Table S1.** Hydrogen-bond geometry (Å, °)

**Compound 1**

| <i>D</i> —H... <i>A</i>      | <i>D</i> —H | H... <i>A</i> | <i>D</i> ... <i>A</i> | <i>D</i> —H... <i>A</i> |
|------------------------------|-------------|---------------|-----------------------|-------------------------|
| O5—H51...O10                 | 0.82        | 1.80          | 2.618 (4)             | 174                     |
| O5—H52...O9 <sup>i</sup>     | 0.82        | 1.88          | 2.694 (4)             | 174                     |
| O6—H61...O7                  | 0.82        | 1.92          | 2.741 (4)             | 177                     |
| O6—H62...O17 <sup>ii</sup>   | 0.82        | 1.74          | 2.549 (4)             | 173                     |
| O6—H62...N5 <sup>ii</sup>    | 0.82        | 2.51          | 3.293 (4)             | 160                     |
| O4—H253...O8 <sup>v</sup>    | 0.82        | 2.55          | 3.101 (4)             | 125                     |
| O4—H253...O9 <sup>v</sup>    | 0.82        | 1.94          | 2.760 (4)             | 179                     |
| O10—H101...O4 <sup>i</sup>   | 0.83        | 2.04          | 2.867 (4)             | 175                     |
| O10—H102...O13               | 0.82        | 1.99          | 2.808 (4)             | 174                     |
| O14—H254...O17 <sup>ii</sup> | 0.82        | 2.23          | 2.895 (4)             | 139                     |
| O14—H142...O16 <sup>ii</sup> | 0.82        | 1.53          | 2.138 (4)             | 128                     |

Symmetry codes: (i)  $x+1, y, z$ ; (ii)  $x, y-1, z$ ; (v)  $-x, -y+1, -z+1$ .

**Compound 2**

| <i>D</i> —H... <i>A</i>      | <i>D</i> —H | H... <i>A</i> | <i>D</i> ... <i>A</i> | <i>D</i> —H... <i>A</i> |
|------------------------------|-------------|---------------|-----------------------|-------------------------|
| O4—H42...O12 <sup>ii</sup>   | 0.82        | 2.33          | 3.149 (3)             | 180                     |
| O4—H42...O13 <sup>ii</sup>   | 0.82        | 2.55          | 3.122 (3)             | 128                     |
| O5—H51...N4                  | 0.82        | 2.51          | 3.279 (3)             | 157                     |
| O5—H51...O12                 | 0.82        | 1.59          | 2.406 (3)             | 173                     |
| O5—H52...N3                  | 0.82        | 2.49          | 3.246 (3)             | 154                     |
| O5—H52...O9 <sup>i</sup>     | 0.82        | 2.49          | 3.031 (3)             | 124                     |
| O5—H52...O10                 | 0.82        | 1.90          | 2.715 (3)             | 176                     |
| O14—H142...O15 <sup>i</sup>  | 0.82        | 1.71          | 2.360 (3)             | 134                     |
| O14—H143...O11 <sup>iv</sup> | 0.82        | 2.45          | 3.245 (3)             | 163                     |
| O14—H143...O13 <sup>iv</sup> | 0.82        | 2.22          | 2.925 (3)             | 144                     |
| O15—H152...O7 <sup>v</sup>   | 0.82        | 2.31          | 3.117 (3)             | 168                     |
| O15—H252...O10               | 0.82        | 2.12          | 2.937 (3)             | 178                     |

Symmetry codes: (i)  $-x+1, -y+1, -z+2$ ; (ii)  $-x+1/2, y-1/2, -z+3/2$ ; (iv)  $-x, -y+1, -z+2$ ; (v)  $-x+1, -y+1, -z+1$ .

**Table S2.** Molecular absorption coefficient of compounds **1-2** in methanol and DMSO

| Solvent         | Compounds | Wavelength<br>( $\lambda_{\text{max}}$ , nm) | Molecular Absorption Coefficient<br>( $\epsilon$ , $\text{M}^{-1}\cdot\text{cm}^{-1}$ ) |
|-----------------|-----------|----------------------------------------------|-----------------------------------------------------------------------------------------|
| <b>Methanol</b> | <b>1</b>  | 399                                          | 5,806                                                                                   |
|                 |           | 341                                          | 11,091                                                                                  |
|                 |           | 293                                          | 32,194                                                                                  |
|                 |           | 206                                          | 60,179                                                                                  |
|                 | <b>2</b>  | 400                                          | 5,660                                                                                   |
|                 |           | 341                                          | 10,559                                                                                  |
|                 |           | 274                                          | 58,423                                                                                  |
|                 |           | 206                                          | 123,429                                                                                 |
| <b>DMSO</b>     | <b>1</b>  | 400                                          | 6,490                                                                                   |
|                 |           | 341                                          | 13,167                                                                                  |
|                 |           | 298                                          | 36,390                                                                                  |
|                 | <b>2</b>  | 402                                          | 6,516                                                                                   |
|                 |           | 341                                          | 13,325                                                                                  |
|                 |           | 276                                          | 40,650                                                                                  |

### Figure captions

**Figure S1: (A).** Comparative FT-IR spectra of Cr-chr-bipy (compound **1**) with chr recorded in KBr.

**(B).** Comparative FT-IR spectra of Cr-chr-phen (compound **2**) with chr recorded in KBr.

**Figure S2:** Full ESI-MS spectra of compound **1** recorded in methanol upon positive ionization

**Figure S3:** Full ESI-MS spectra of compound **2** recorded in methanol upon positive ionization

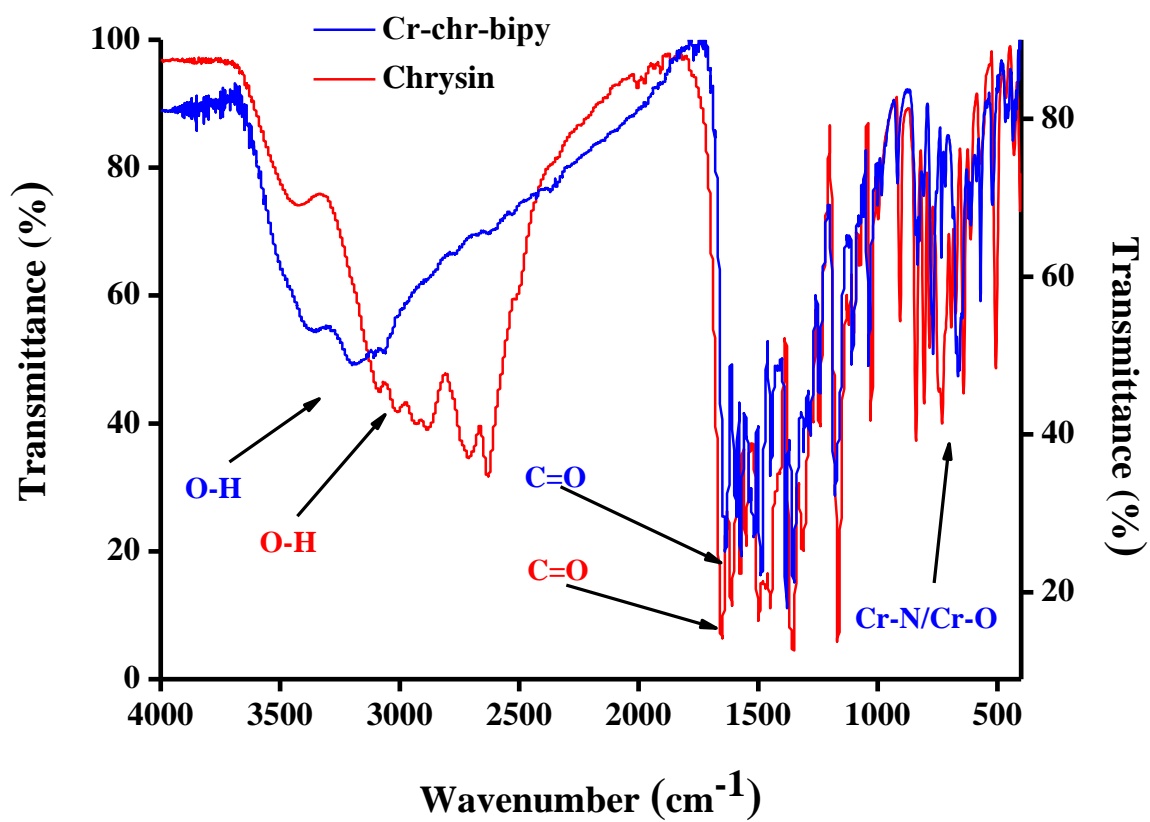

**Figure S1A**

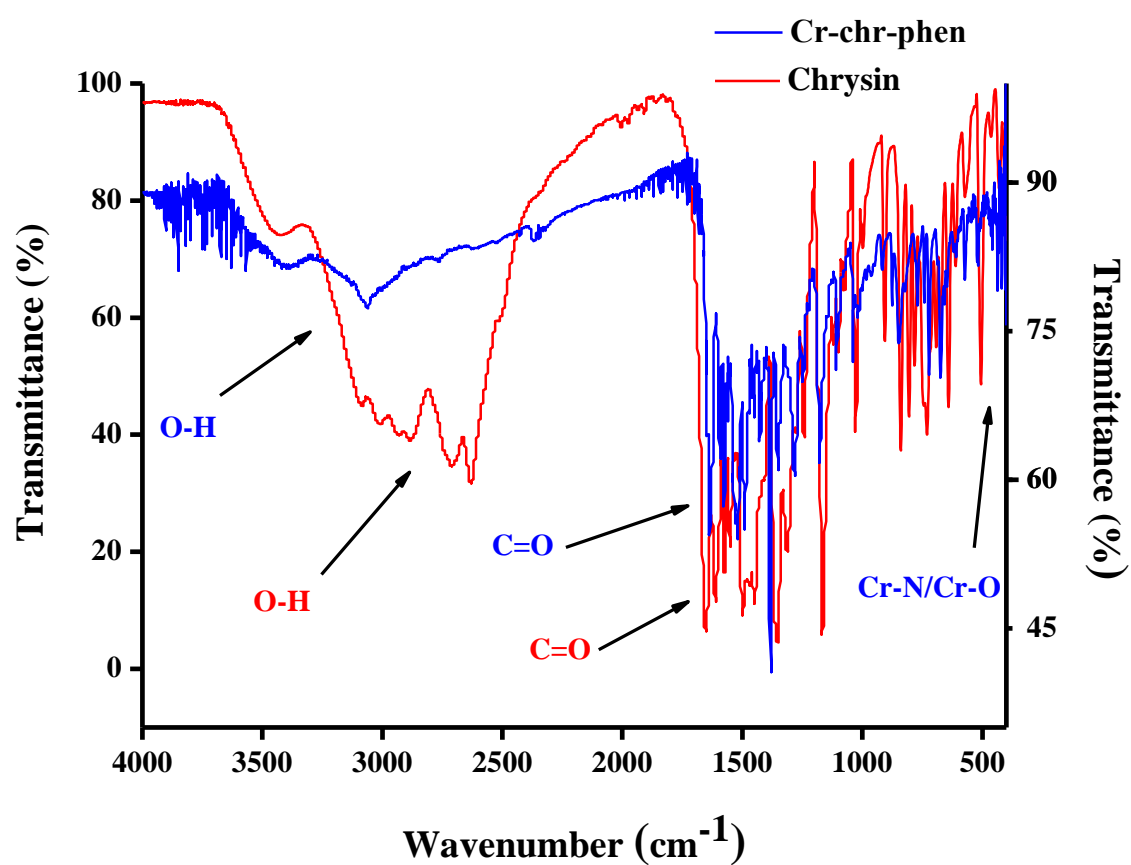

**Figure S1B**

Infusion\_10 #37 RT: 0.28 AV: 1 NL: 4.54E8  
T: FTMS + c ESI Full ms [350.00-1500.00]

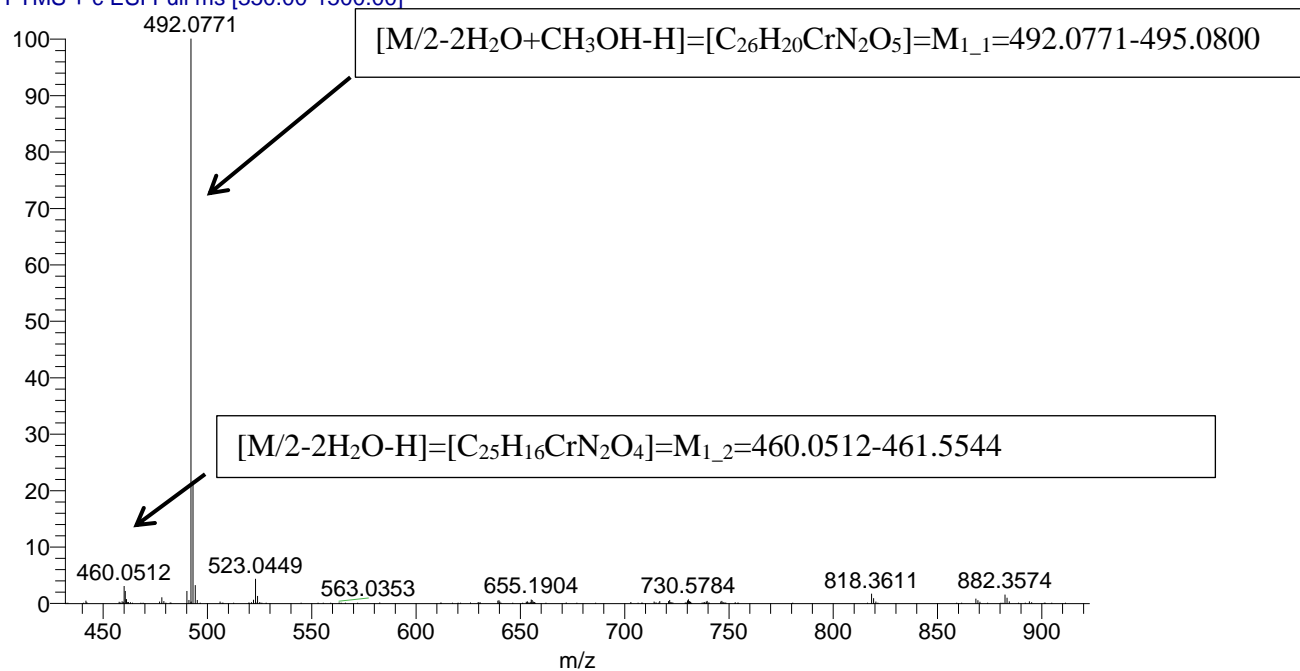

**Figure S2**

Infusion\_9 #541 RT: 4.26 AV: 1 NL: 5.33E6  
T: FTMS + c ESI Full ms [450.00-800.00]

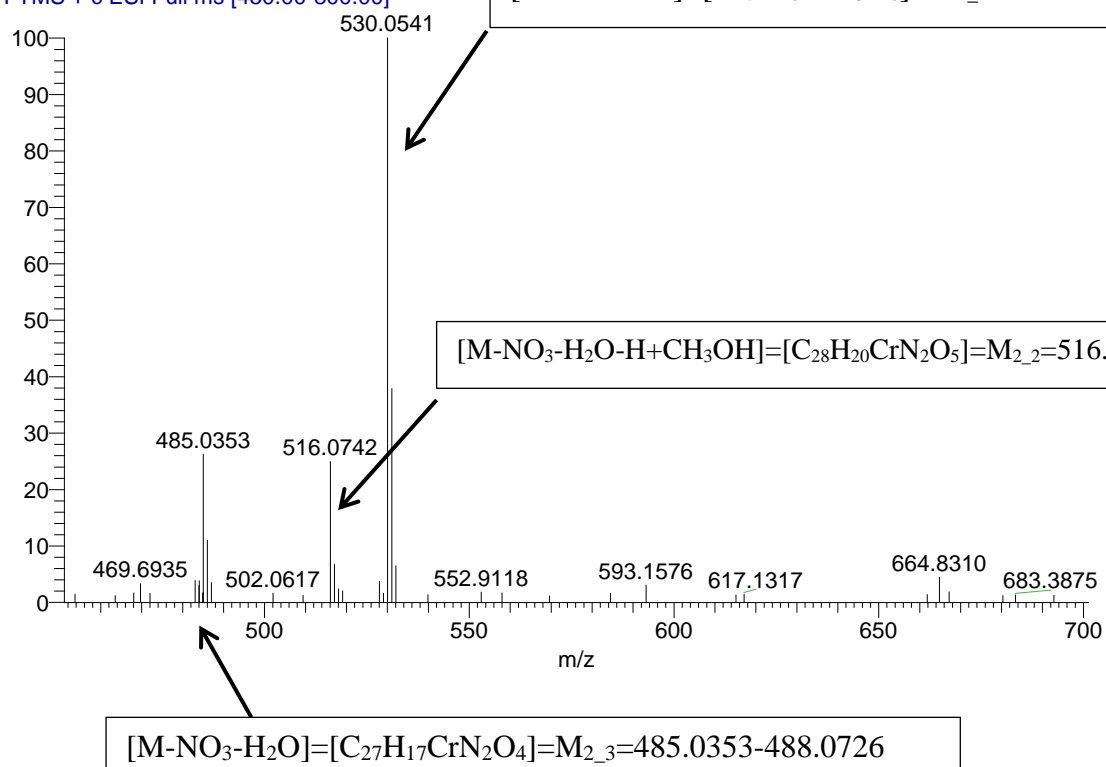

**Figure S3**
